# Supplementary material
Source: PubMed Central journal article supplement (PMC2793099)
Supplement: NIHMS134538-supplement-01.pdf [file NIHMS134538-supplement-01.pdf]

Single Mass Analysis

Tolerance = 10.0 PPM / DBE: min = -1.5, max = 100.0

Element prediction: Off

Number of isotope peaks used for i-FIT = 3

Monoisotopic Mass, Even Electron Ions

84 formula(e) evaluated with 1 results within limits (up to 50 closest results for each mass)

Elements Used:

C: 0-100 H: 0-150 N: 2-4 O: 3-5 P: 0-1

Mathews, Thomas, VPC44239 Mass Spectrometry Center, SCS, University of Illinois

Qtof\_24745a 40 (2.829) AM (Cen,3, 80.00, Ht,15000.0,558.36,0.70); Sm (SG, 2x3.00); Cm (40:43)

2: TOF MS ES+  
9.33e+001

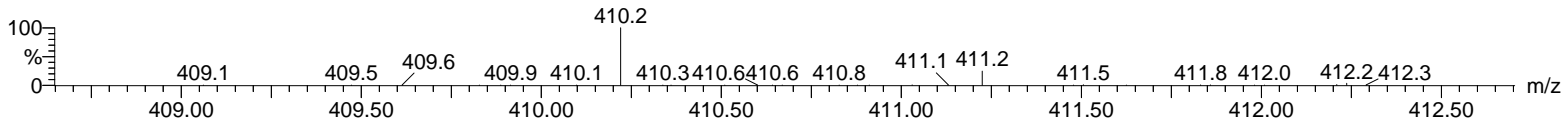

Minimum: -1.5  
Maximum: 5.0 10.0 100.0

| Mass     | Calc. Mass | mDa  | PPM  | DBE | i-FIT | Formula         |
|----------|------------|------|------|-----|-------|-----------------|
| 410.2203 | 410.2209   | -0.6 | -1.5 | 6.5 | 0.0   | C20 H33 N3 O4 P |
