# Supplementary material
Source: PubMed Central journal article supplement (PMC2793099)

RT: 0.00 - 21.03

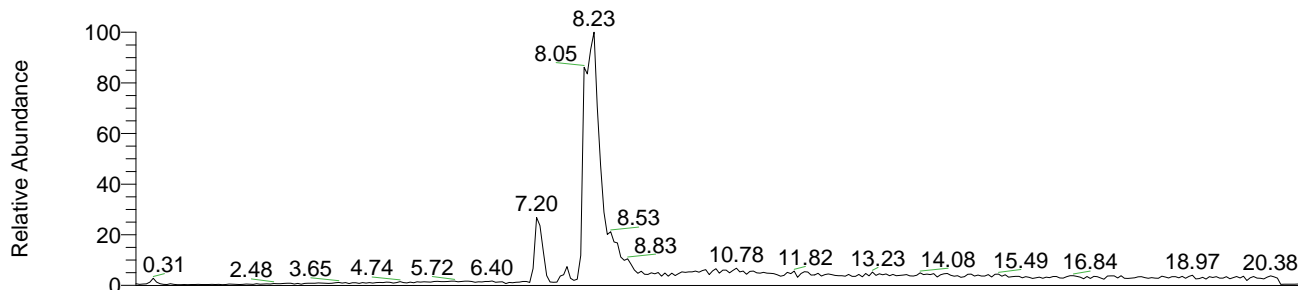

NL: 6.93E8  
Base Peak m/z=  
200.00-500.00 F: +  
c ESI Full ms [  
150.00-1000.00]  
MS Lcq\_5777

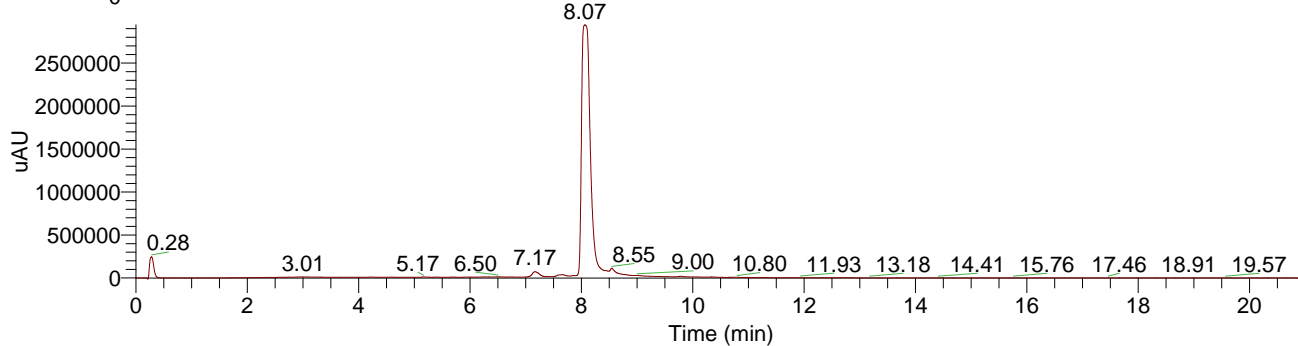

NL: 2.94E6  
Channel A UV  
Lcq\_5777

Lcq\_5777 #267 RT: 8.17 AV: 1 NL: 6.46E8  
F: + c ESI Full ms [ 150.00-1000.00]

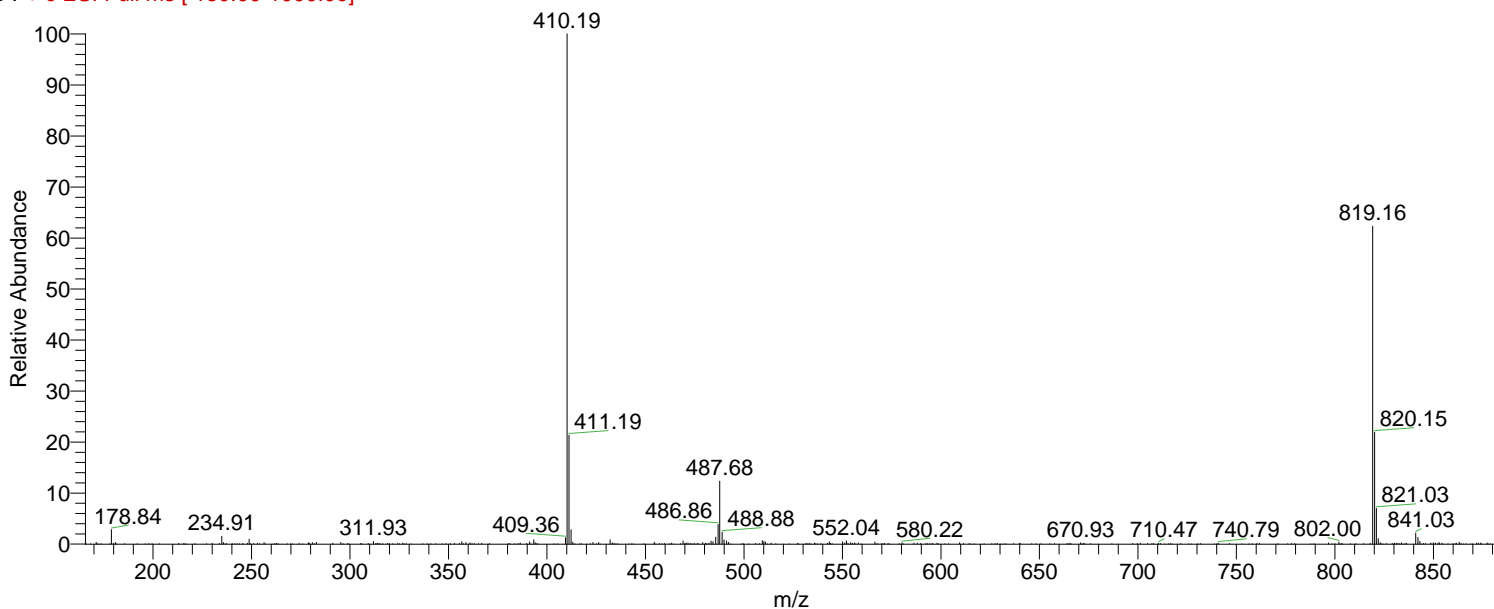

Lcq\_5777 #239 RT: 7.32 AV: 1 NL: 9.31E7  
F: + c ESI Full ms [ 150.00-1000.00]

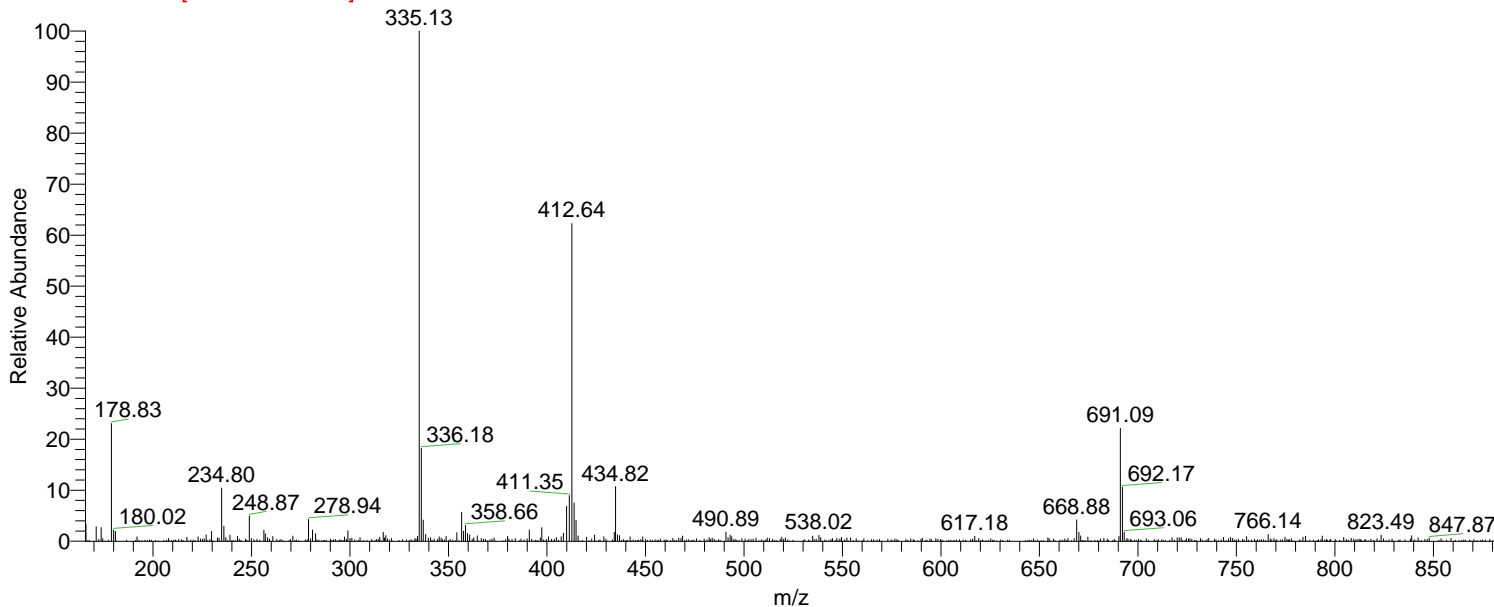

Supplement: NIHMS134538-supplement-03.pdf [file NIHMS134538-supplement-03.pdf]
