# Supplementary material
Source: PubMed Central journal article supplement (PMC2793099)
Supplement: NIHMS134538-supplement-04.pdf [file NIHMS134538-supplement-04.pdf]

Single Mass Analysis

Tolerance = 10.0 PPM / DBE: min = -1.5, max = 100.0

Element prediction: Off

Number of isotope peaks used for i-FIT = 3

Monoisotopic Mass, Even Electron Ions

73 formula(e) evaluated with 1 results within limits (up to 50 closest results for each mass)

Elements Used:

C: 0-100 H: 0-150 N: 2-4 O: 1-3 P: 0-1

Mathews, Thomas, VPC45064 Mass Spectrometry Center, SCS, University of Illinois

Qtof\_24746a 41 (2.901) AM (Cen,3, 80.00, Ht,15000.0,558.36,0.70); Sm (SG, 2x3.00); Cm (40:44)

2: TOF MS ES+  
6.46e+001

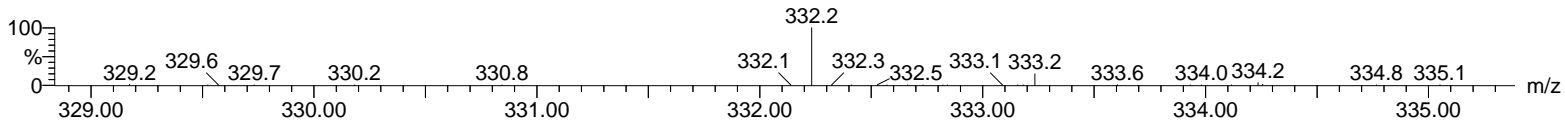

Minimum: -1.5  
Maximum: 5.0 10.0 100.0

| Mass     | Calc. Mass | mDa  | PPM  | DBE | i-FIT | Formula       |
|----------|------------|------|------|-----|-------|---------------|
| 332.2329 | 332.2338   | -0.9 | -2.7 | 6.5 | 0.3   | C19 H30 N3 O2 |
