# Supplementary material
Source: PubMed Central journal article supplement (PMC2793099)
Supplement: NIHMS134538-supplement-06.pdf [file NIHMS134538-supplement-06.pdf]

RT: 0.00 - 21.02 SM: 7B

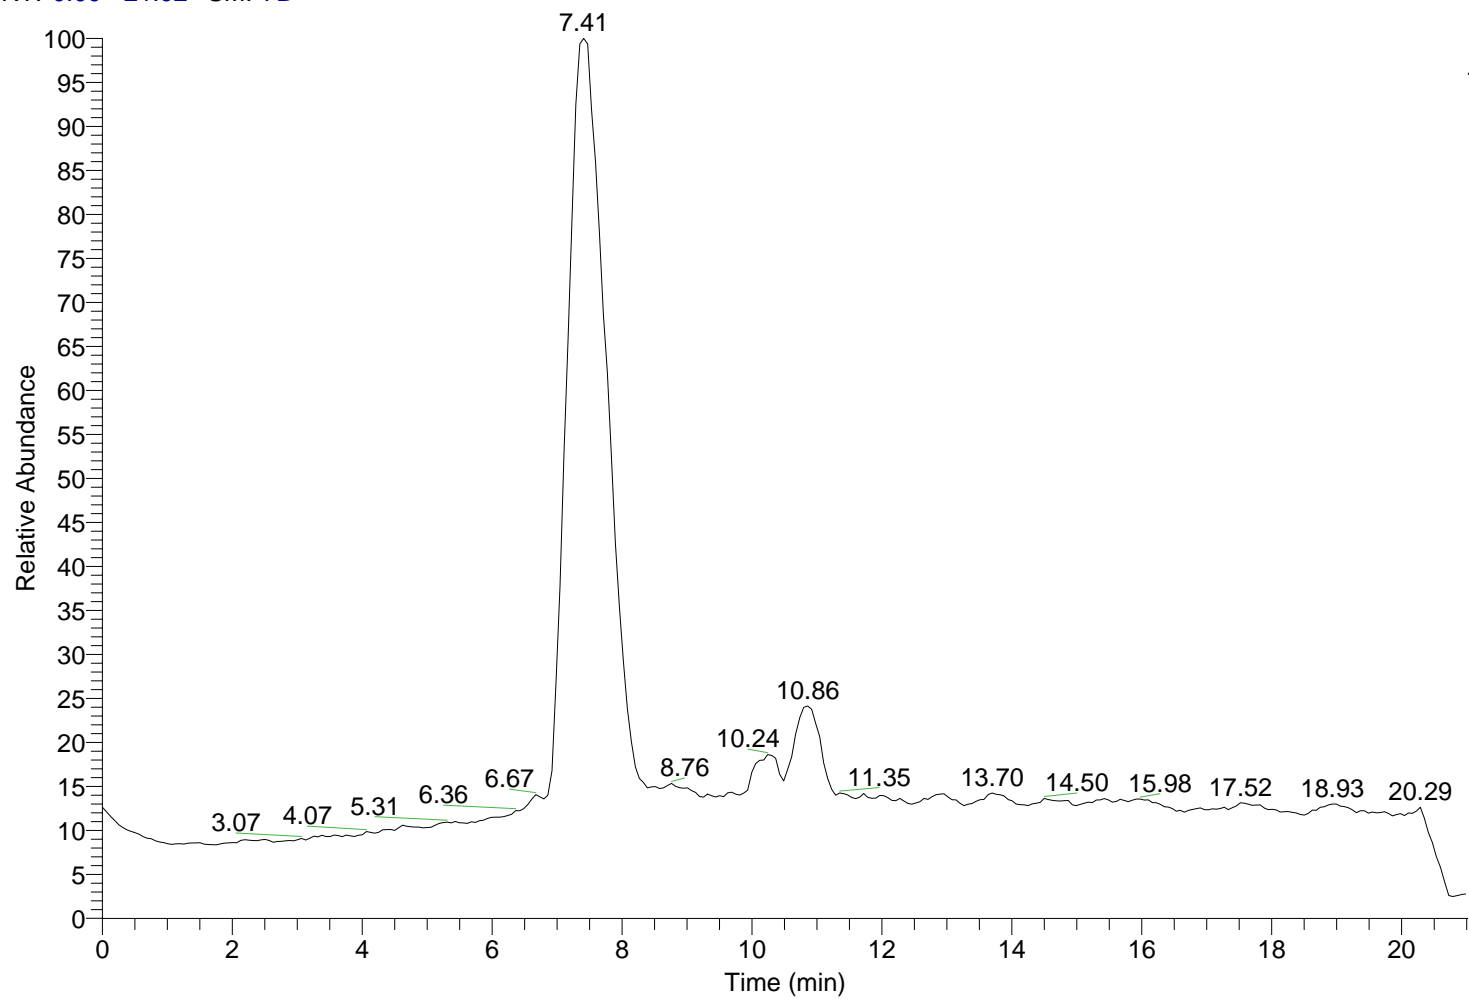

NL:  
1.73E9  
TIC F: + c  
ESI Full ms [  
150.00-  
1000.00] MS  
Lcq\_5779

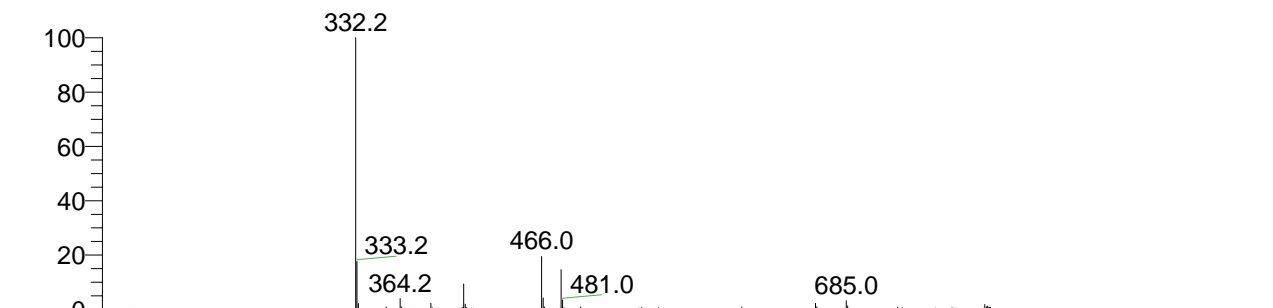

NL: 4.48E8  
Lcq\_5779#225-257 RT:  
6.98-7.96 AV: 17 SB: 45  
3.01-5.74 T: + c ESI Full  
ms [ 150.00-1000.00]

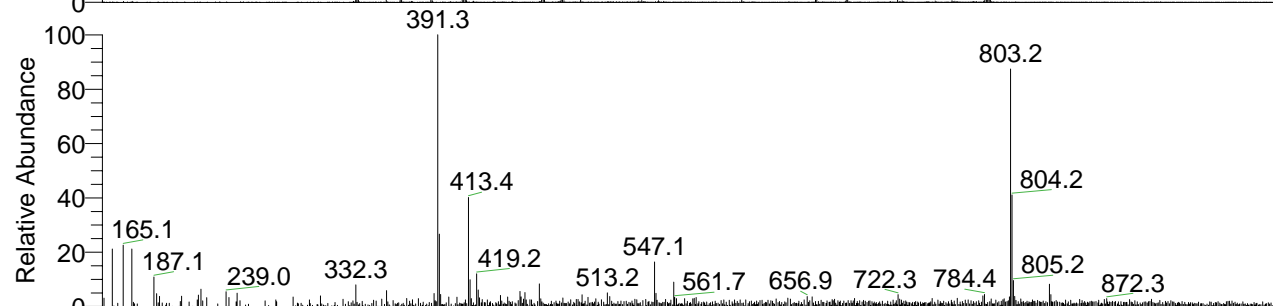

NL: 1.19E7  
Lcq\_5779#318-338 RT:  
9.87-10.43 AV: 10 SB: 45  
3.01-5.74 T: + c ESI Full  
ms [ 150.00-1000.00]

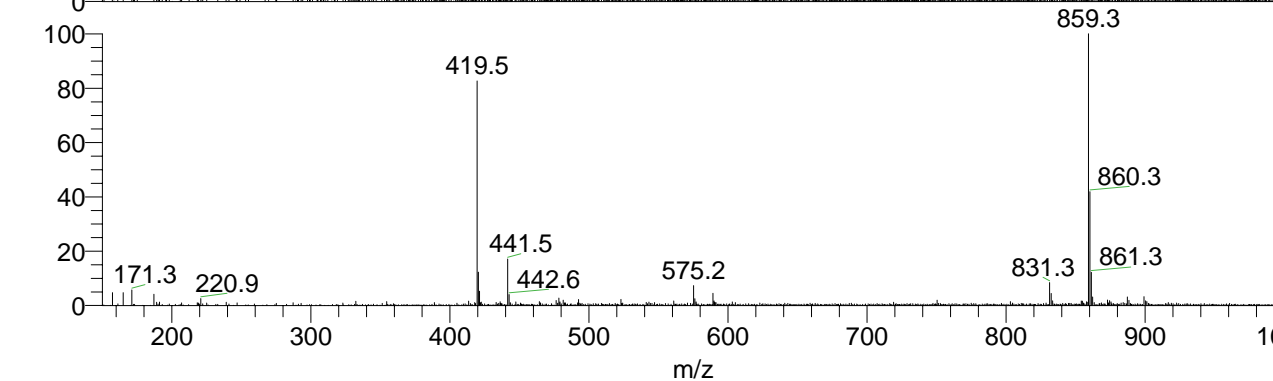

NL: 4.35E7  
Lcq\_5779#343-360 RT:  
10.61-11.10 AV: 9 SB: 45  
3.01-5.74 T: + c ESI Full  
ms [ 150.00-1000.00]
