# Supplementary material
Source: PubMed Central journal article supplement (PMC2793099)

Mathews, Thomas, VPC44239

Mass Spectrometry Center, SCS, University of Illinois

Qtof\_24745a 40 (2.865) Cm (40:43-9:12)

1: TOF MS ES+  
4.35e3

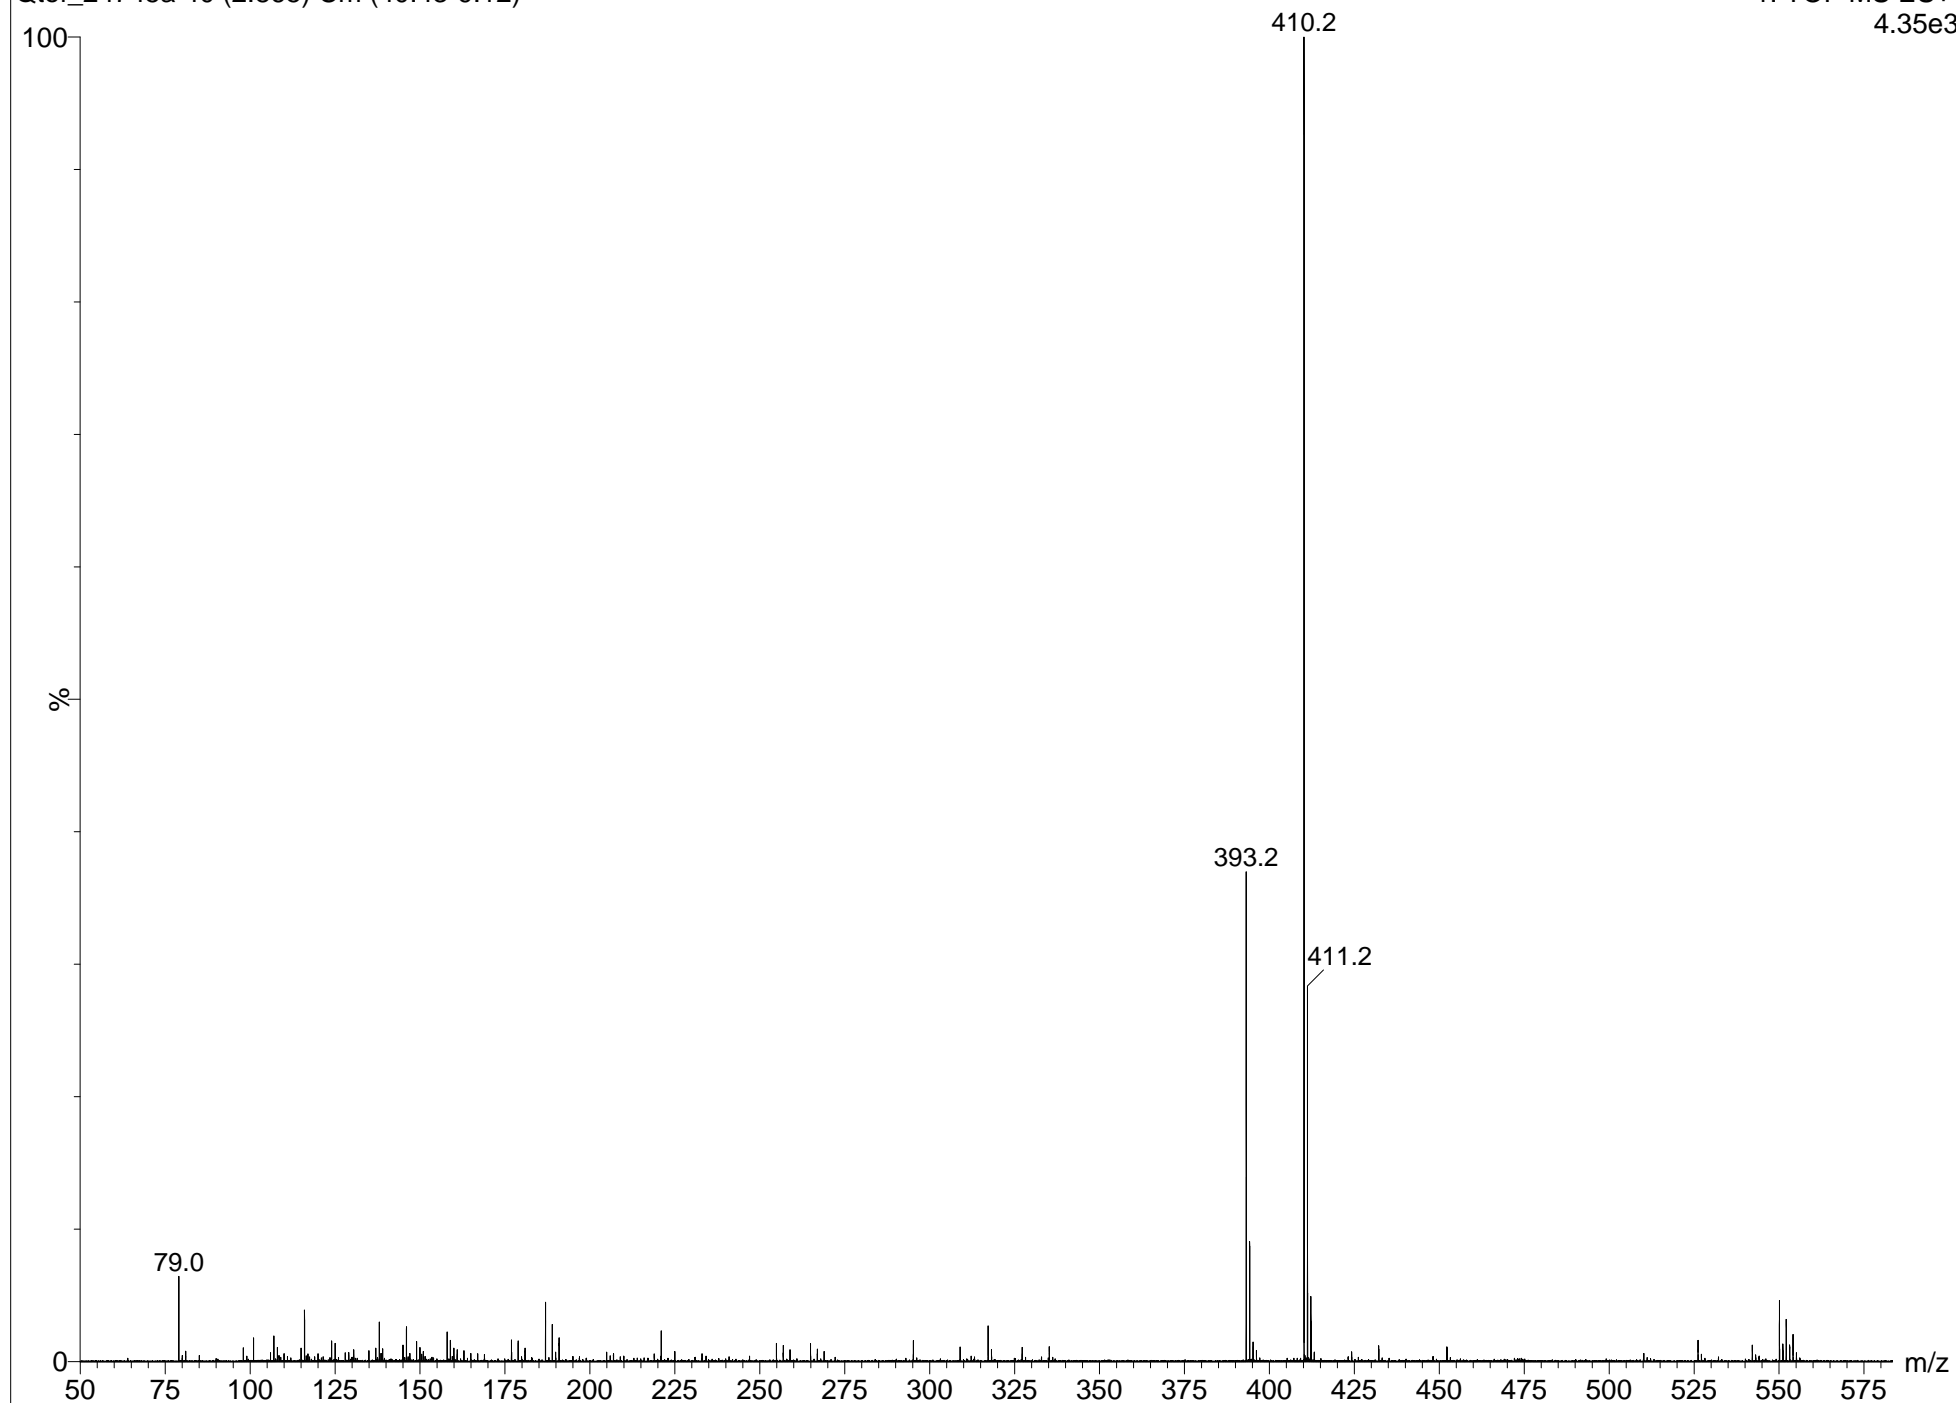

Supplement: NIHMS134538-supplement-02.pdf [file NIHMS134538-supplement-02.pdf]

Mathews, Thomas, VPC45064

Mass Spectrometry Center, SCS, University of Illinois

Qtof\_24746a 30 (2.151) Cm (30:31-10:13)

1: TOF MS ES+  
2.69e3

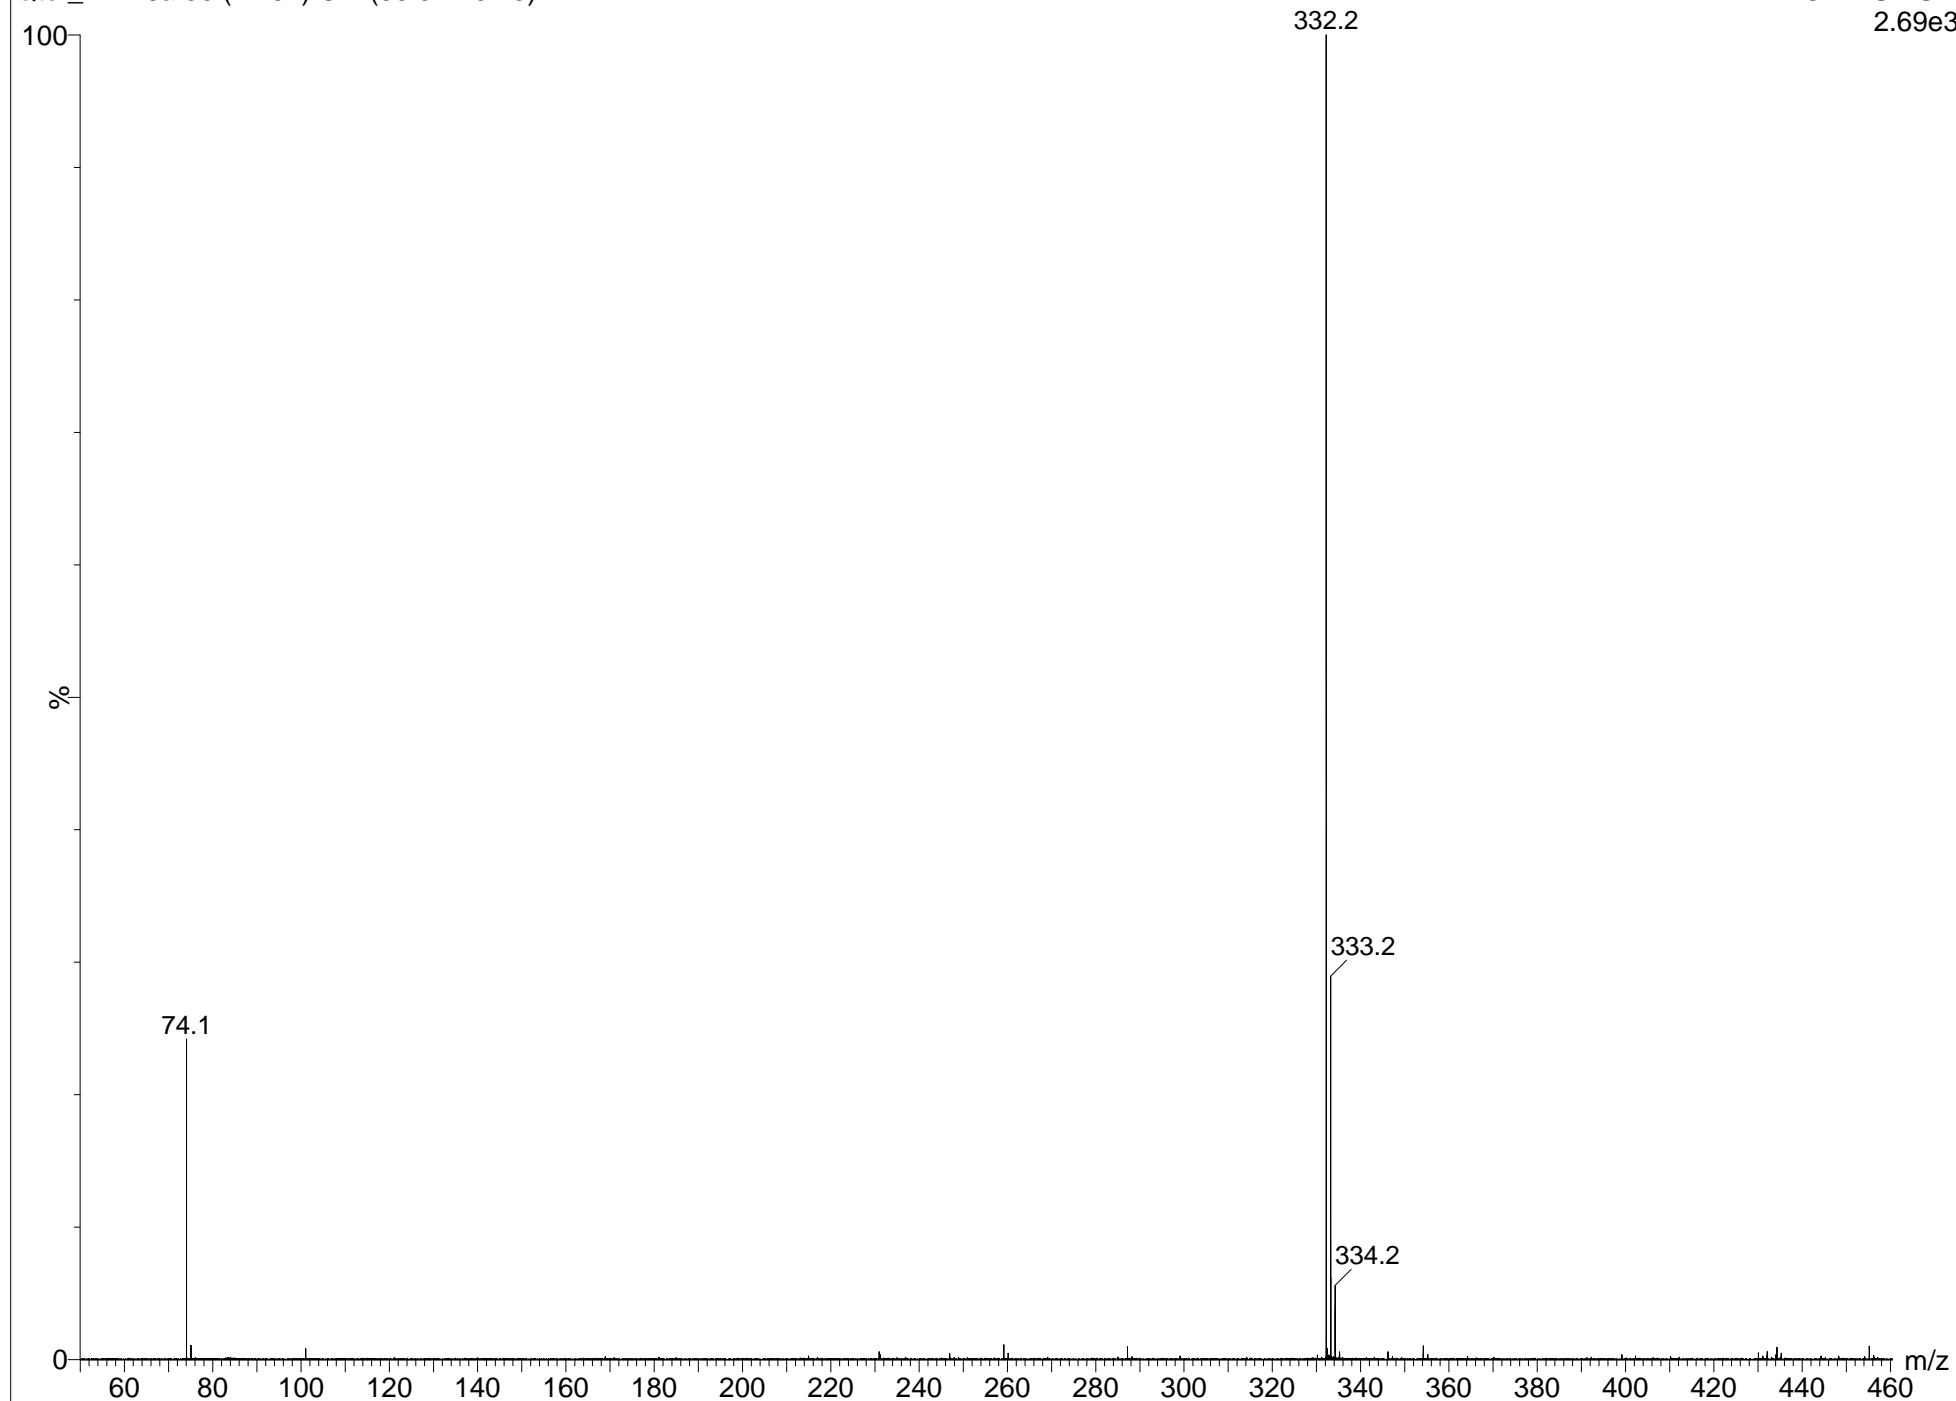

Supplement: NIHMS134538-supplement-05.pdf [file NIHMS134538-supplement-05.pdf]
